# Supplementary material for: The GSK3β inhibitor BIS I reverts YAP-dependent EMT signature in PDAC cell lines by decreasing SMADs expression level
Source: PubMed Central journal article supplement (PMC5041998; doi:10.18632/oncotarget.8437), 2016-03-28
Supplement: oncotarget-07-26551-s001.pdf [file oncotarget-07-26551-s001.pdf]

## SUPPLEMENTARY FIGURES AND TABLES

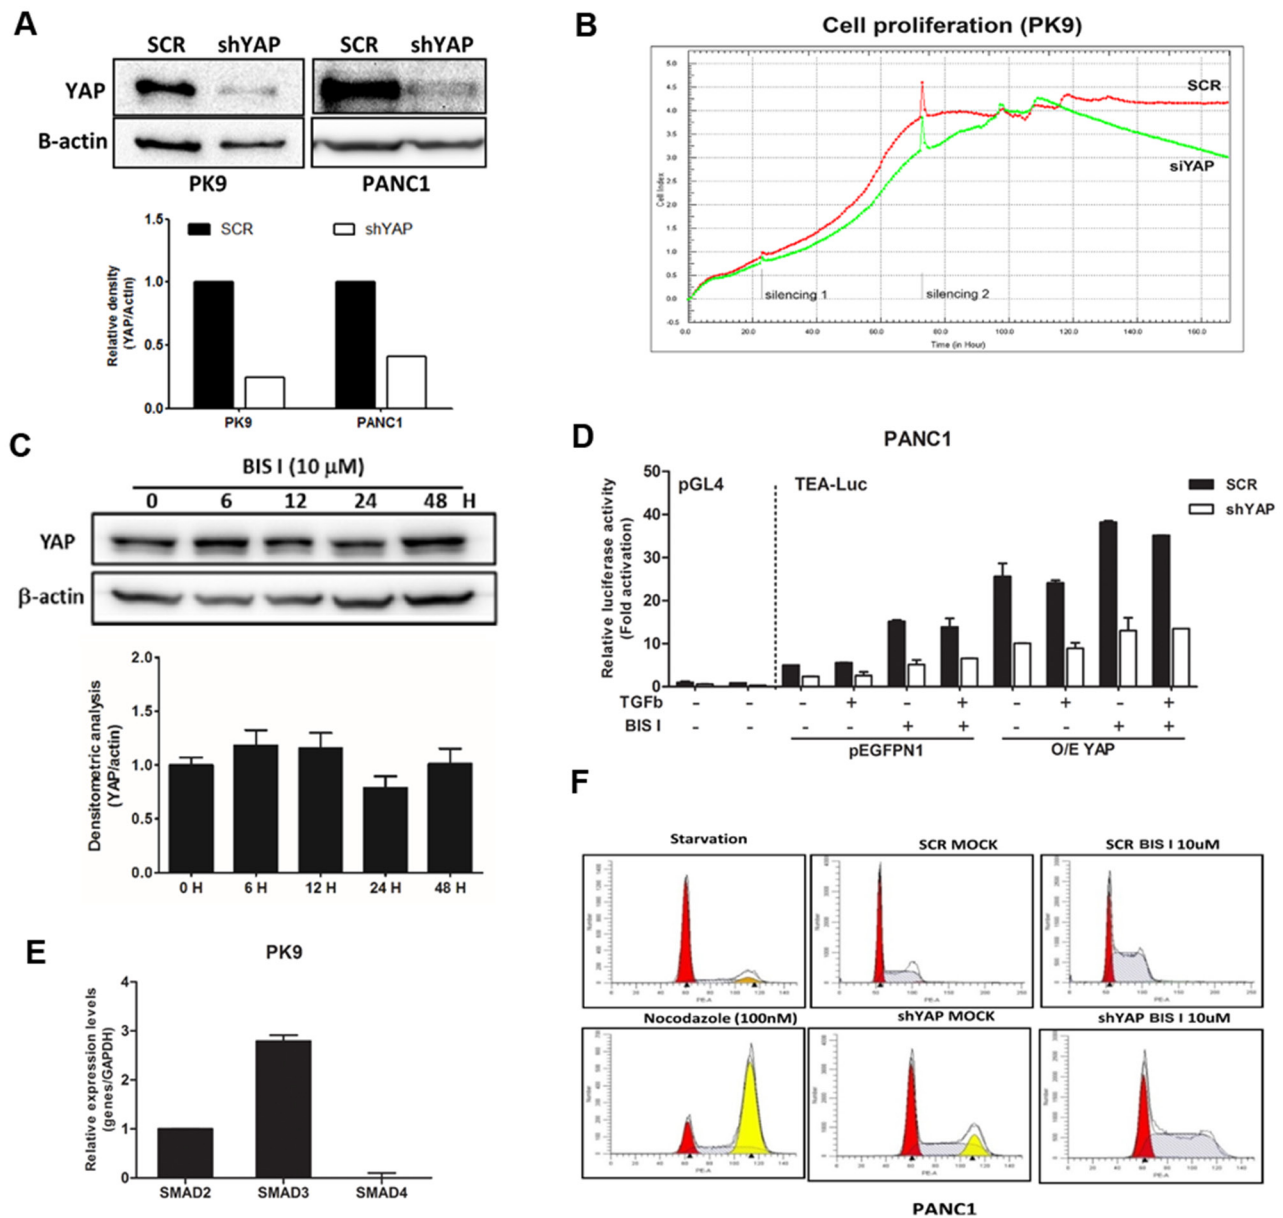

**Supplementary Figure S1: A. Silencing efficiency using transduction of short-hairpin RNAs against YAP in PDAC cell lines.** Representative western blots of YAP levels and  $\beta$ -catenin in stably silenced PDAC cell lines. Densitometric analysis was performed using Image J software (below panel). **B. Genetic ablation of YAP slows cell proliferation rate.** PK9 were seeded 5000 cells/well in E-plates (Roche), in triplicates. Cell indexes of growth were automatically recorded by the xCELLigence System (Roche) in real time. **C. Endogenous protein expression of YAP does not change during BIS I treatment.** Representative western blots showing the expression level of YAP during a time course treatment of BIS I 10 $\mu$ M. Relative protein expression was quantified. **D. TGF- $\beta$  independent regulation of TEA reporter activity.** SCR or stably YAP-silenced PANC1 cells were transiently co-transfected with pEGFPN1 or YAP (O/E YAP) and TEA reporter (8xGTIIIC-Luc reporter). They were treated with BIS I 5 $\mu$ M in the presence and absence of TGF- $\beta$  for 24h. The firefly luciferase signals were normalized to the ones of *Renilla*. (mean $\pm$ SD from biological triplicates). **E. SMADs gene expression level in PK9.** Expression level of *SMAD2*, *SMAD3* and *SMAD3* were measured by qRT-PCR. **F. BIS I treatment and genetic ablation of YAP induce accumulation of S-phase cell sub-populations.** PANC1 cells were treated with BIS I 10 $\mu$ M for 24h. Starvation and Nocodazole conditions were used as controls for G0/G1 and S-phase accumulation, respectively. Cell cycle phase analysis was done using ModFit LT 3.2 software and the Sync Wizard model.

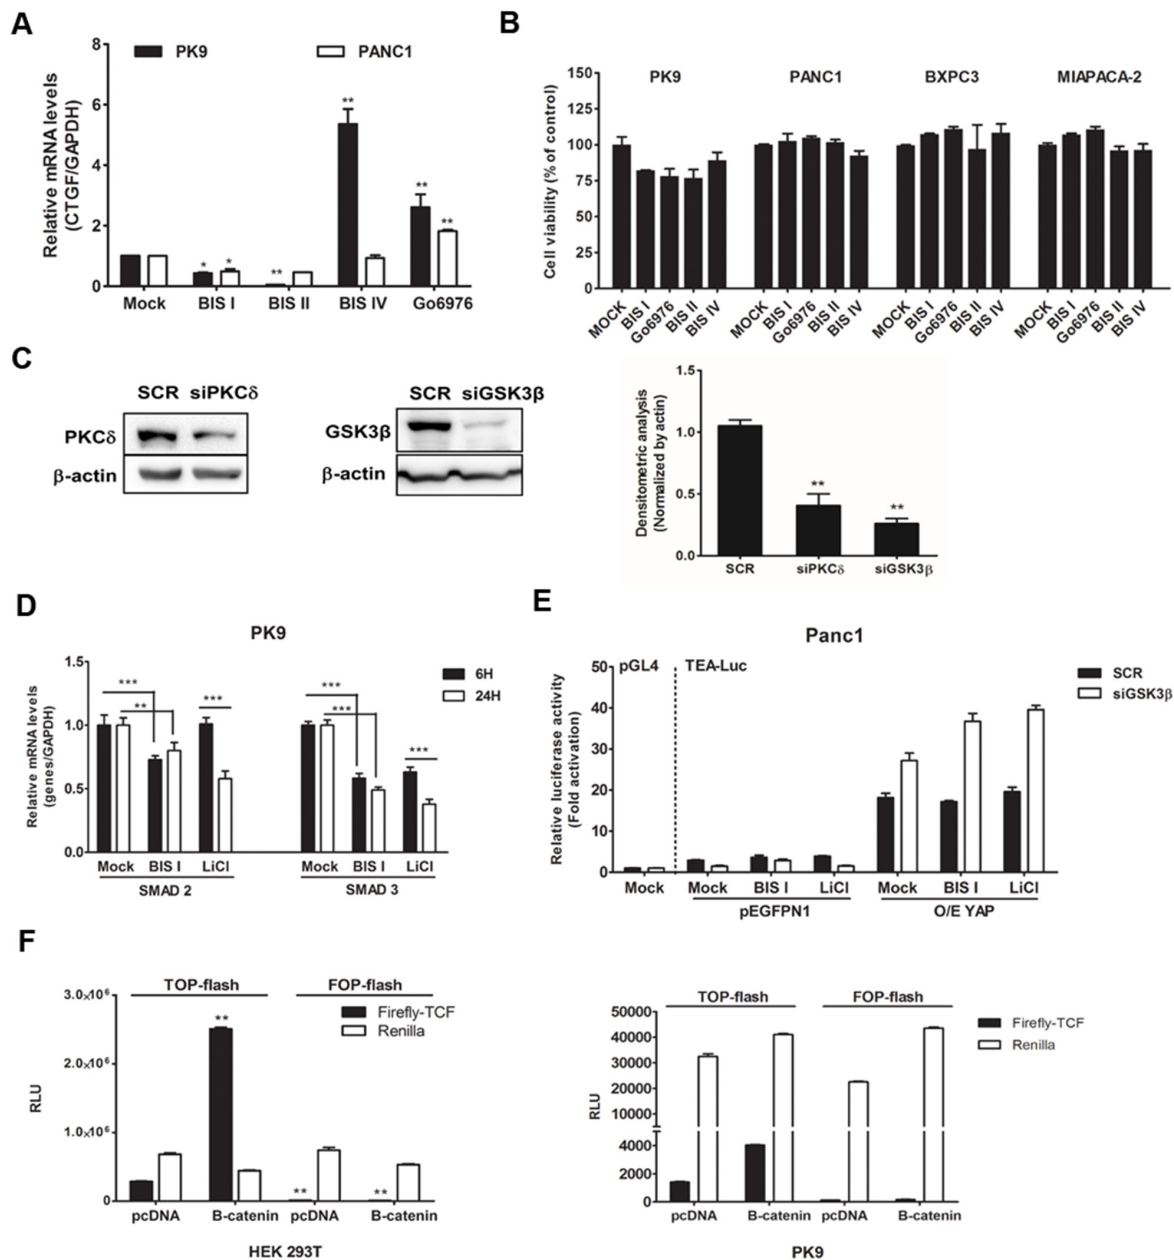

**Supplementary Figure S2: A. Opposite effects of bisindolylmaleimide kinase inhibitors on CTGF mRNA expression.** PK9 and PANC1 cells were treated with DMSO, BIS I, Go6976, BIS II, and BIS IV compounds (5 $\mu$ M) for 24H and qRT-PCRs were performed to quantify *CTGF* expression relative to *GAPDH*. (\* $p$ <0.05 and \*\* $p$ <0.01 versus MOCK). **B. PDAC cell lines show different sensitivity upon treatment with Bisindolylmaleimide family of compounds.** Cell viability of PDAC cell lines treated with as in (A) for 24H and evaluated by MTT assay. **C. Silencing of PKC $\delta$  or GSK3 $\beta$  in PK9.** PK9 cells were incubated with siRNA targeting PKC $\delta$ , GSK3 $\beta$ , and non-targeting control (SCR) for 72H. Transient knock down of PKC $\delta$  and GSK3 $\beta$  were confirmed by immunoblotting against PKC $\delta$  and GSK3 $\beta$  antibodies. The relative intensities of the bands normalized by  $\beta$ -actin is indicated. (\*\* $p$ <0.01 versus SCR). **D. Loss of SMADs mRNAs during prolonged treatment with LiCl.** PK9 cells were treated with BIS I 10 $\mu$ M or LiCl 50mM for 24H. Quantitative RT-PCRs of *SMAD2* and *SMAD3* relative to *GAPDH* expression with respect to MOCK are presented as mean $\pm$ SD. (\*\* $p$ <0.01 versus MOCK). **E. Genetic ablation of GSK3 $\beta$  activates YAP/TEAD reporter activity.** PANC1 cells were incubated with siRNA targeting GSK3 $\beta$ , and non-targeting control (SCR) for 48H and then they were transiently co-transfected with pEGFPN1 or YAP (O/E YAP) and TEA reporter. Twenty-four hours after transfection, cells were then treated with BIS I 5 $\mu$ M and LiCl 50mM for 24H. Right panel: YAP is required for TEA reporter activation. The firefly luciferase signals were normalized to the ones of *Renilla*. **F.  $\beta$ -catenin reporter activity in HEK293T and PK9 cells.** HEK293T cells (Left) and PK9 cells (right) were transiently transfected with Wild-type TCF binding site (TOP-flash) which is responsive to  $\beta$ -catenin expression or with mutated binding site (FOP-flash). The firefly luciferase signals were normalized to the ones of *Renilla*.

**Supplementary Table S1: List of hits derived from High-Content Screening of the kinase inhibitor library.**

**See Supplementary File 1**

**Supplementary Table S2: List of primers used for qRT-PCRs.**

**See Supplementary File 2**
